# Supplementary material
Source: PubMed Central journal article supplement (PMC1976570)
Supplement: plntphys_pp.107.096917_2.pdf [file plntphys_pp.107.096917_2.pdf]

## SUPPLEMENTAL MATERIAL

**Figure S1.** Expression pattern of newly identified vacuolar and putative vacuolar membrane proteins was investigated using Meta-Analyzer of GENEVESTIGATOR. The highest signal intensity is represented by a dark blue (100%) and the absent signal by white (0%). Signal intensity levels of all genes were checked using the Digital Northern tool. Genes showing almost always an “Absent” call were excluded from the analysis.

**Supplementary Table I.** Table lists soluble and membrane proteins identified in different subfractions. For membrane proteins are indicated the total and unique number of peptides assigned to the protein, the protein probability, the mass differences observed for the theoretical and experimental masses of the precursor ions, the sequence coverage and peptide sequences.
