# Supplementary material
Source: PubMed Central journal article supplement (PMC1976570)

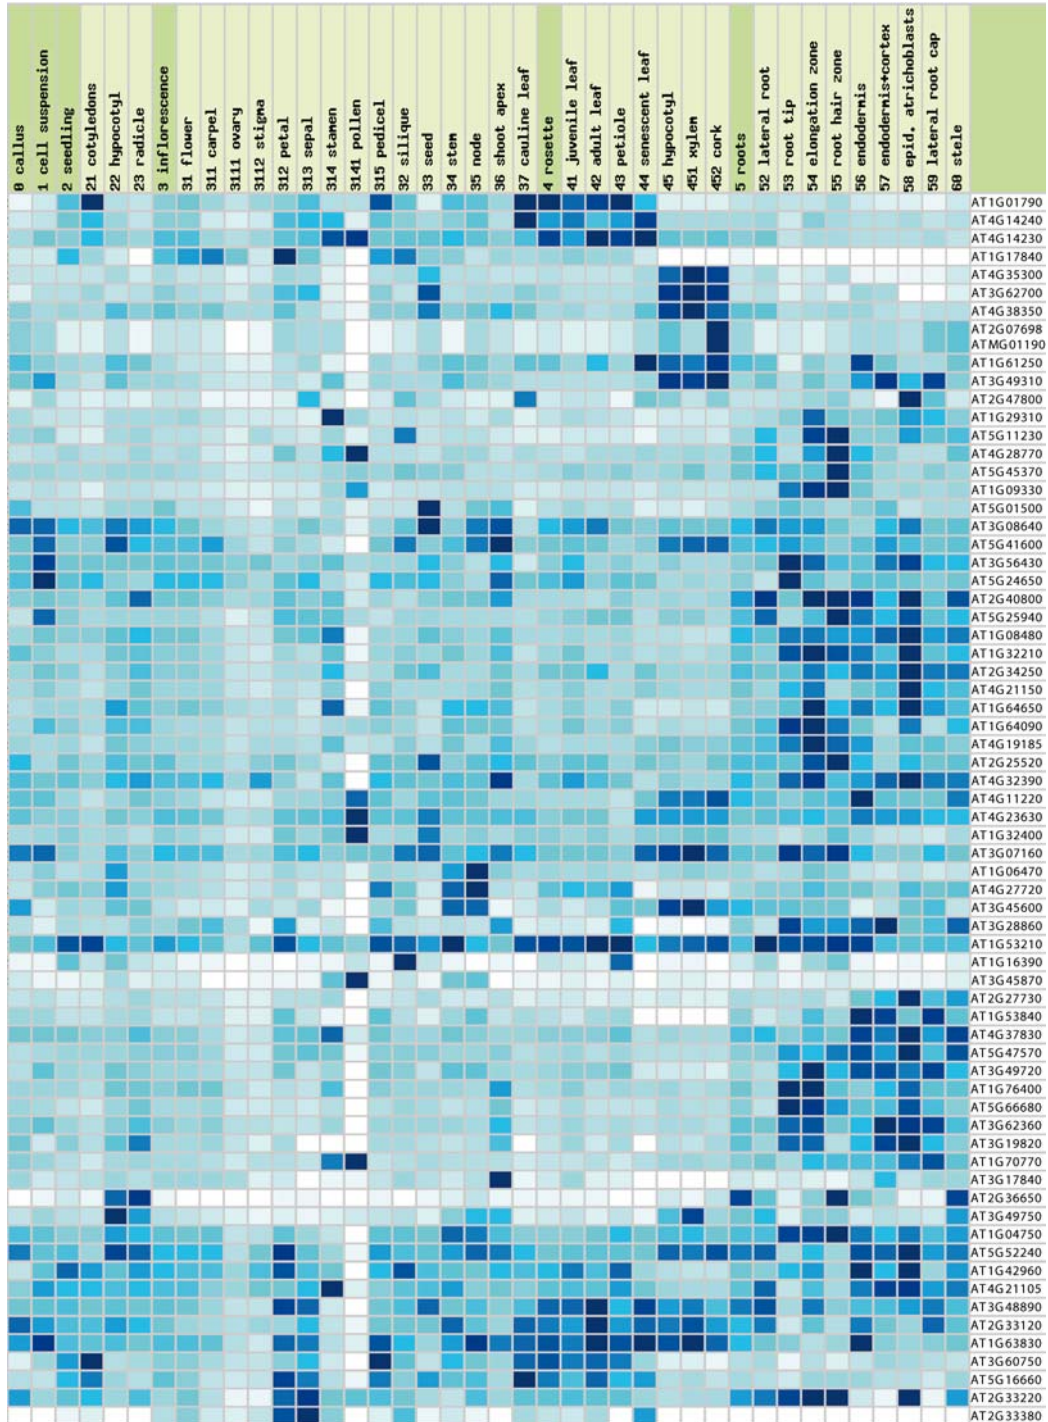

Supplement: plntphys_pp.107.096917_1.pdf [file plntphys_pp.107.096917_1.pdf]
